# Supplementary material
Source: PubMed Central journal article supplement (PMC4507126)
Supplement: Supp_Fig1.pdf [file Supp_Fig1.pdf]

## Supplementary Data

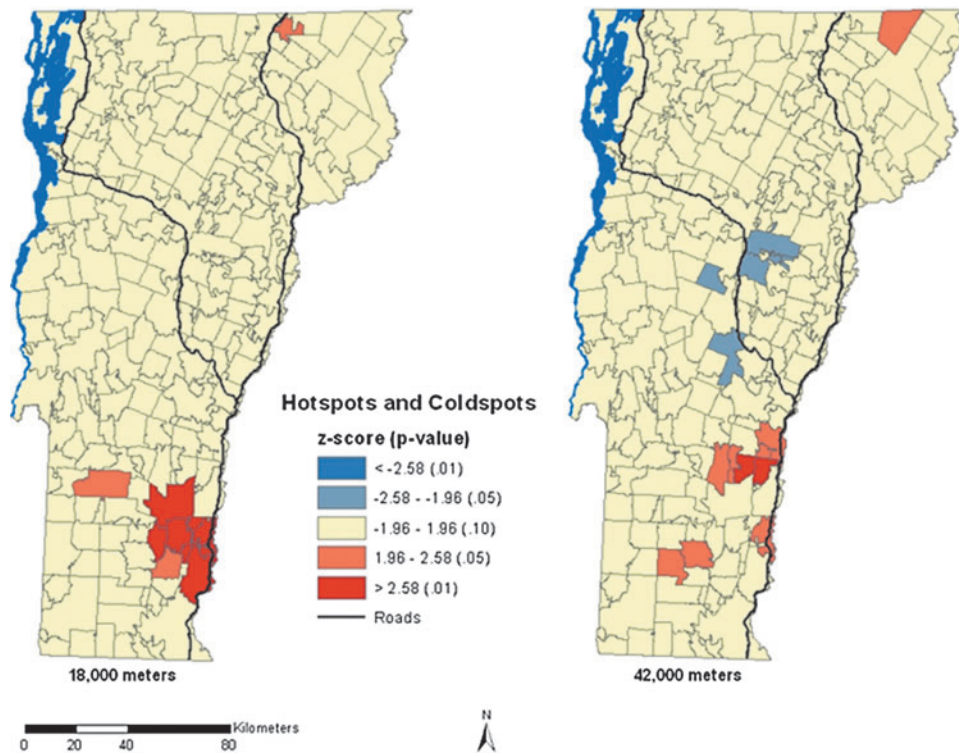

**SUPPLEMENTARY FIG. S1.** Clusters of thyroid cancer incidence in Vermont, United States, 1994–2007. For the Getis-Ord  $G_i^*$  statistic, two zones of indifference of 18,000 m and 42,000 m were used. Clusters were significant ( $p < 0.05$ ) if there was a higher (red) or lower (blue) proportion of thyroid cancer incidence (normalized per 100,000) than expected within the specified distance.
