# Supplementary material
Source: PubMed Central journal article supplement (PMC4507126)
Supplement: Supp_Fig2.pdf [file Supp_Fig2.pdf]

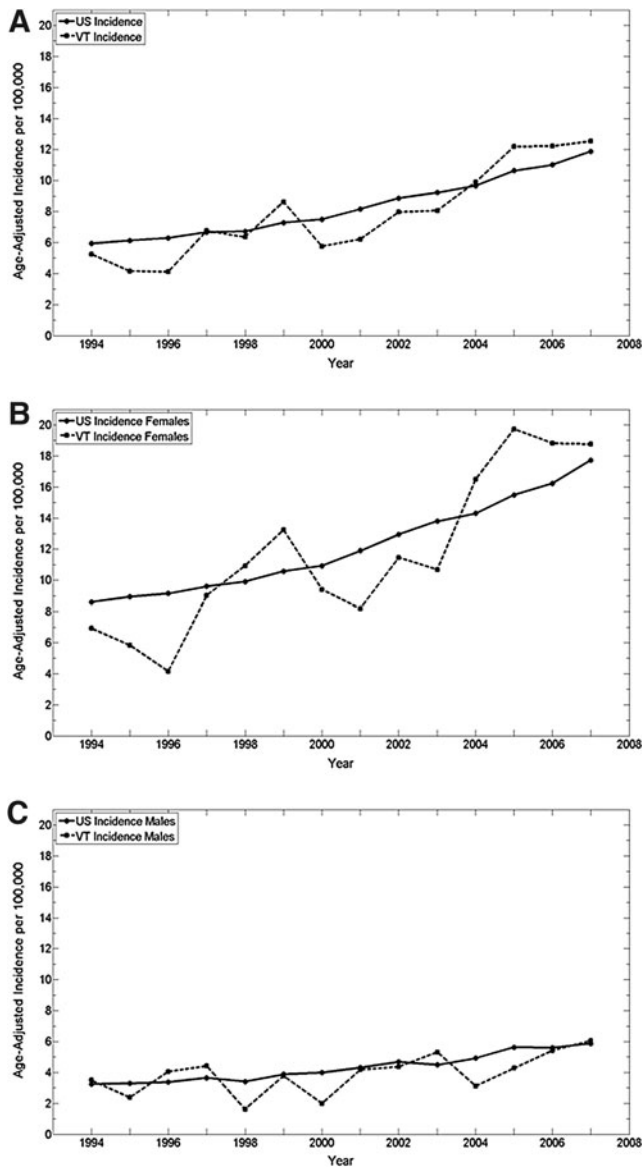

**SUPPLEMENTARY FIG. S2.** Age-adjusted incidence of thyroid cancer per 100,000 people for the United States and Vermont, 1994–2007. (A) The average annual age-adjusted incidence was 8.0 (VT) and 8.4 (U.S.). The annual percent change (EAPC) at 8.3 [CI 5.7–11.0] for Vermont and 5.7 [CI 5.2–6.3] for the United States were significant ( $p < 0.001$ ). (B) The average annual age-adjusted incidence for females was 11.8 (VT) and 12.3 (U.S.). The EAPC was 9.9 [CI 5.9–4.0] for Vermont and 5.9 [CI 5.4–6.3] for the United States were significant ( $p < 0.001$ ). (C) The average annual age-adjusted for males was 4.1 (VT) and 4.4 (U.S.). The EAPC was 4.9 [CI 0.2–9.9] for Vermont and 5.1 [CI 4.4–5.7] for the United States were significant at  $p < 0.05$  (VT) and  $p < 0.001$  (U.S.).
